# Supplementary material
Source: publisher figshare collection journal article supplement (https://tandf.figshare.com/ndownloader/files/22231512)
Supplement: Supplementary file 1 [file 22231512]

## Supplementary Data

### Water end-uses and rainwater harvesting: a case study in Brazil

Gabriela Hammes, Enedir Ghisi, Liseane Padilha Thives

Federal University of Santa Catarina, Department of Civil Engineering, Laboratory of Energy

Efficiency in Buildings, Florianópolis, SC, 88040-900, Brazil

Table S.1. Water availability and population for the five geographic regions of Brazil.

| Region       | Water availability (%) | Population (%) | Water availability (m <sup>3</sup> per capita/year) |
|--------------|------------------------|----------------|-----------------------------------------------------|
| North        | 69                     | 8              | 307,603                                             |
| Northeast    | 3                      | 28             | 3,900                                               |
| Southeast    | 6                      | 43             | 4,615                                               |
| South        | 6                      | 15             | 75,511                                              |
| Central-West | 15                     | 7              | 33,762                                              |

Source: IBGE and ANA (2004) apud Ghisi (2006).

Table S.2. Potential for potable water savings for each geographic region in Brazil

| Region       | Specific volume of rainwater<br>(m <sup>3</sup> per capita/year) | Potable water demand       |                                     | Potential for potable<br>water savings (%) |
|--------------|------------------------------------------------------------------|----------------------------|-------------------------------------|--------------------------------------------|
|              |                                                                  | (litres per<br>capita/day) | (m <sup>3</sup> per<br>capita/year) |                                            |
| North        | 38.419                                                           | 88                         | 32.120                              | 100                                        |
| Northeast    | 21.457                                                           | 97                         | 35.405                              | 61                                         |
| Southeast    | 27.953                                                           | 158                        | 57.670                              | 48                                         |
| South        | 35.000                                                           | 117                        | 42.705                              | 82                                         |
| Central-West | 32.608                                                           | 120                        | 43.800                              | 74                                         |

Source: Based on Ghisi (2006).

Table S.3. Indoor water end-uses in houses in the USA and Canada

| <b>Activity</b>     | <b>Water end-use (%)</b> |
|---------------------|--------------------------|
| Toilet flush*       | 24                       |
| Shower              | 20                       |
| Tap                 | 19                       |
| Washing machine*    | 17                       |
| Leaks               | 12                       |
| Others              | 4                        |
| Bath                | 3                        |
| Dishwashing machine | 1                        |
| Total               | 100                      |
| *Total non-potable  | 41                       |

Source: Based on DeOreo et al. (2016).

Table S.4. Existing appliances in the house

| <b>Room</b>                  | <b>Appliance</b>           |
|------------------------------|----------------------------|
| Kitchen                      | Tap                        |
| Bathroom on the ground floor | Shower                     |
|                              | Tap                        |
|                              | Toilet flush               |
| Laundry room                 | Washing machine            |
|                              | Tap                        |
| Outdoor                      | Hose in front of the house |
|                              | Hose behind the house      |
| Bathroom on the first floor  | Shower                     |
|                              | Tap                        |
|                              | Toilet flush               |
| Master bathroom              | Shower                     |
|                              | Tap                        |
|                              | Toilet flush               |

Table S.5. Estimated water end-uses

| Water appliance    | Water end-use |       |
|--------------------|---------------|-------|
|                    | Litres/day    | %     |
| Shower             | 97.2          | 36.6  |
| Toilet flush*      | 82.6          | 31.1  |
| Kitchen tap        | 30.8          | 11.6  |
| Washing machine*   | 24.0          | 9.1   |
| Hose*              | 15.5          | 5.8   |
| Bathroom tap       | 14.2          | 5.3   |
| Laundry tap*       | 1.1           | 0.4   |
| Total              | 265.5         | 100.0 |
| *Total non-potable | 123.2         | 46.4  |

Table S.6. Input data used in the *Netuno* computer programme

| Input variable                                                 | Data                 |
|----------------------------------------------------------------|----------------------|
| First flush                                                    | 2 mm                 |
| Daily rainfall data                                            | Variable             |
| Rainwater catchment area                                       | 192.3 m <sup>2</sup> |
| Number of residents                                            | 2                    |
| Total daily water demand                                       | Variable             |
| Non-potable water demand (% of daily potable water demand)     | 46.5%                |
| Runoff coefficient                                             | 0.90                 |
| Maximum capacity of the lower rainwater tank                   | 5,000 L              |
| Interval between lower rainwater tank capacities               | 100 L                |
| Upper rainwater tank capacity                                  | 250 L                |
| Water volume in the upper tank below which rainwater is pumped | 10%                  |

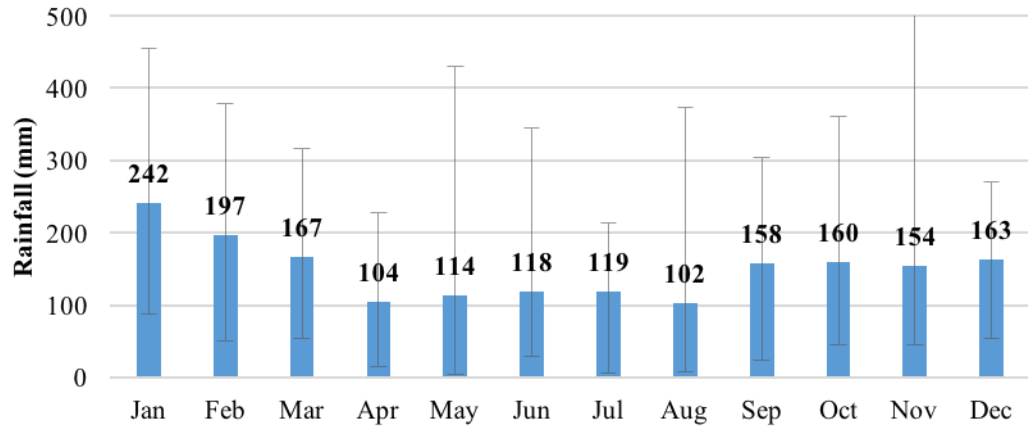

Fig. S.1. Monthly average rainfall from January 1990 to December 2017 in Blumenau

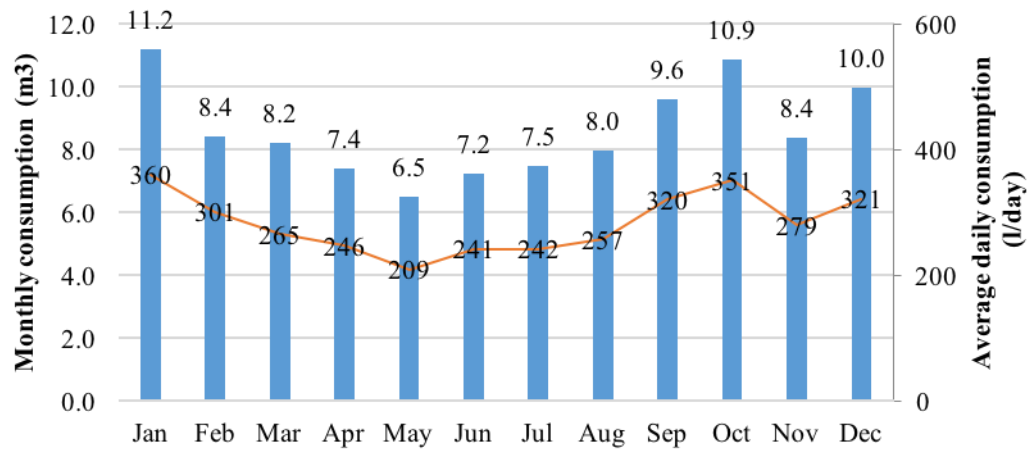

Fig. S.2. Water consumption in the house over 2017

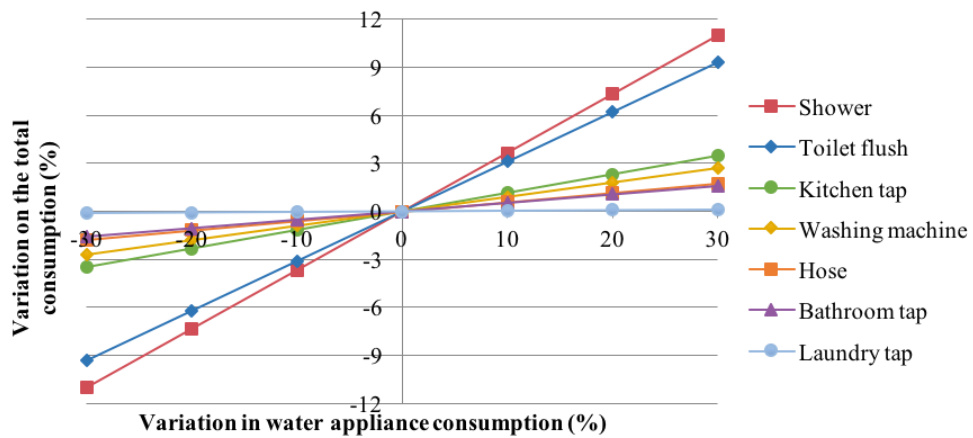

Fig. S.3. Variation of total water consumption according to variation in consumption of each water appliance

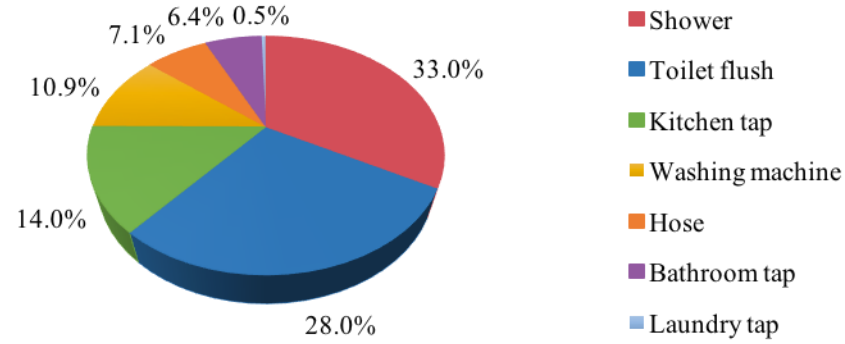

Fig. S.4. Water end-uses after the sensitivity analysis

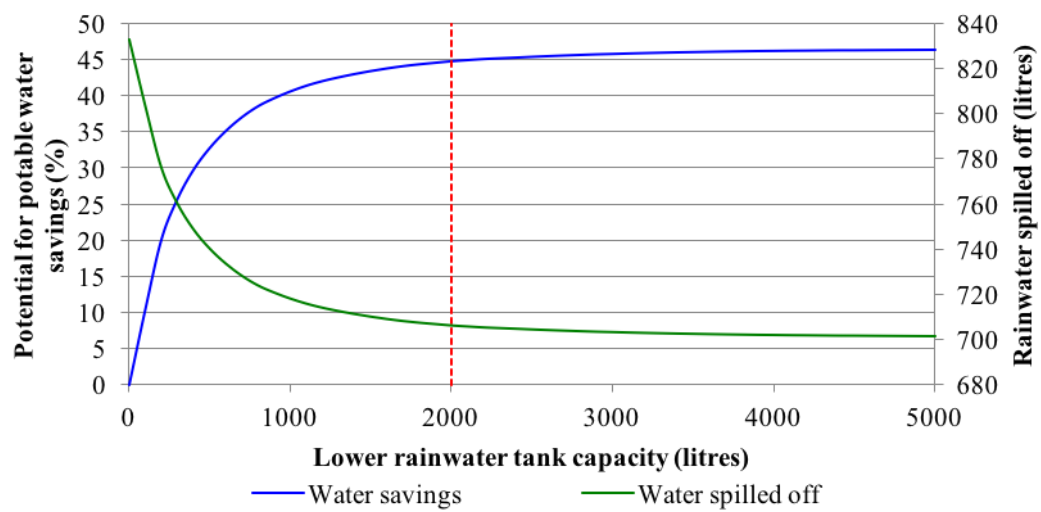

Fig. S.5. Potential for potable water savings and volume of water spilled off as a function of the capacity of the lower rainwater tank.

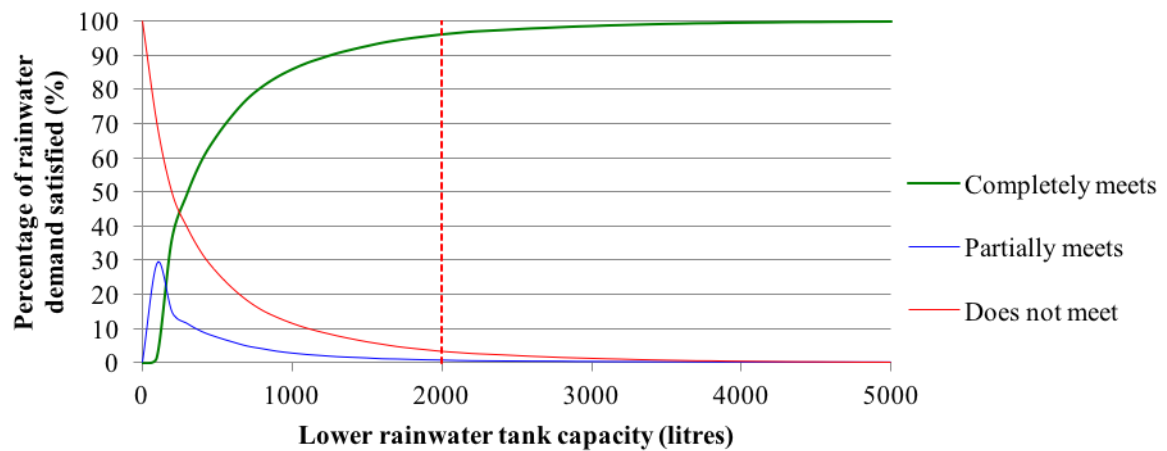

Fig. S.6. Percentage of days when the demand for non-potable water is fully, partially, and not met

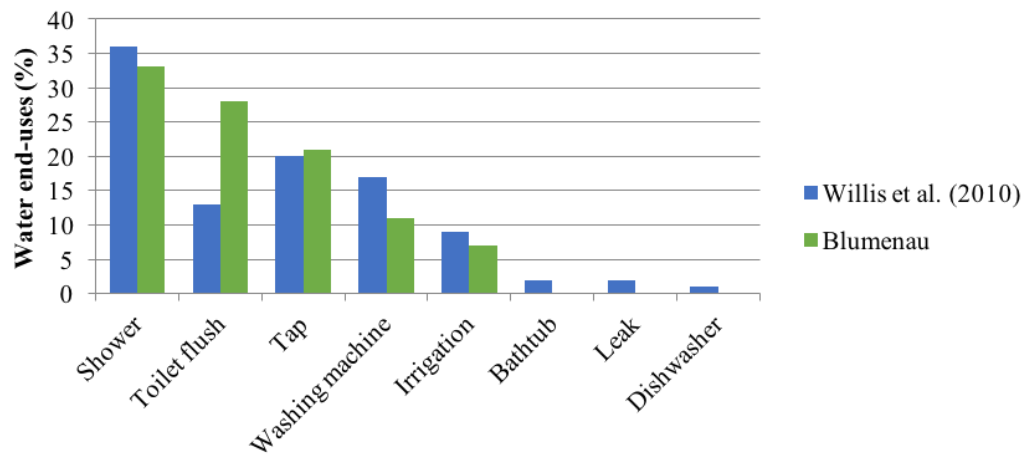

Fig. S.7. Water end-uses obtained in Blumenau (this study) and Australia (Willis et al., 2010)

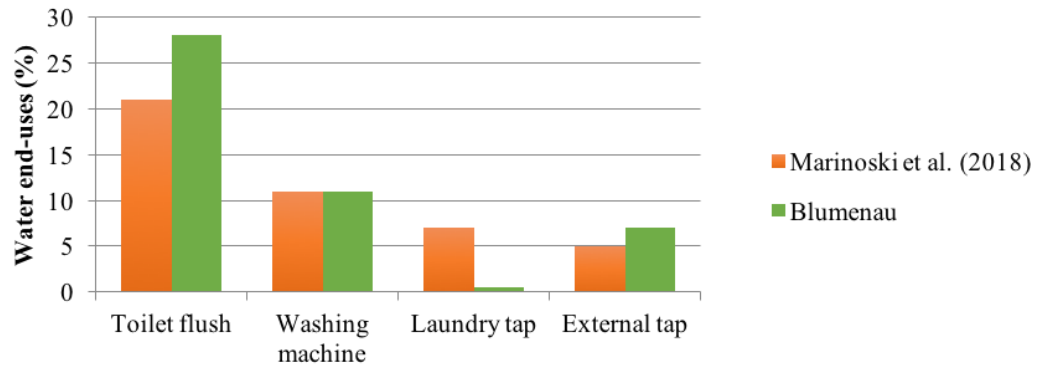

Fig. S.8. Non-potable water end-uses in Blumenau (this study) and the metropolitan area of Florianópolis (Marinowski et al., 2018)
